# Supplementary material for: Facile fabrication of SnO2@TiO2core–shell structures as anode materials for lithium-ion batteries
Source: Royal Society of Chemistry journal article supplement (doi:10.1039/c6ta03915d), 2016-01-01
Supplement: c6ta03915d1.pdf [file c6ta03915d1.pdf]

## Electronic Supplementary Information (SI)

### Facile fabrication of SnO<sub>2</sub>@TiO<sub>2</sub> core-shell structures as anode materials for lithium-ion batteries

Zheng Yi,<sup>ab</sup> Qigang Han,<sup>\*ab</sup> Ping Zan,<sup>a</sup> Yong Cheng,<sup>b</sup> Yaoming Wu,<sup>b</sup> and Limin Wang<sup>\*b</sup>

*a College of Materials Science and Engineering, Jilin University, Changchun, 130025, China*

*b State Key Laboratory of Rare Earth Resource Utilization, Changchun Institute of Applied Chemistry, CAS, Changchun 130022, China.*

#### Corresponding author:

E-mail address: hanqg@jlu.edu.cn (Qigang Han).

E-mail address: lmwang@ciac.ac.cn (Limin Wang).

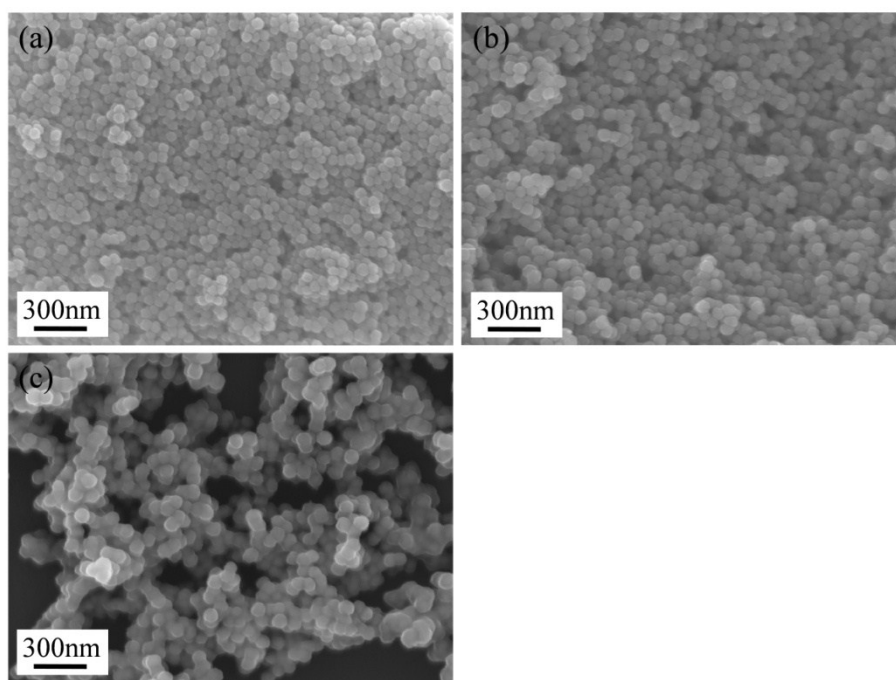

Fig. S1. SEM images of the carbon-coated  $\text{SnO}_2$  precursors precipitated in different concentration of aqueous glucose solution, (a) 0.5 M, (b) 0.8 M and (c) 1.1 M.

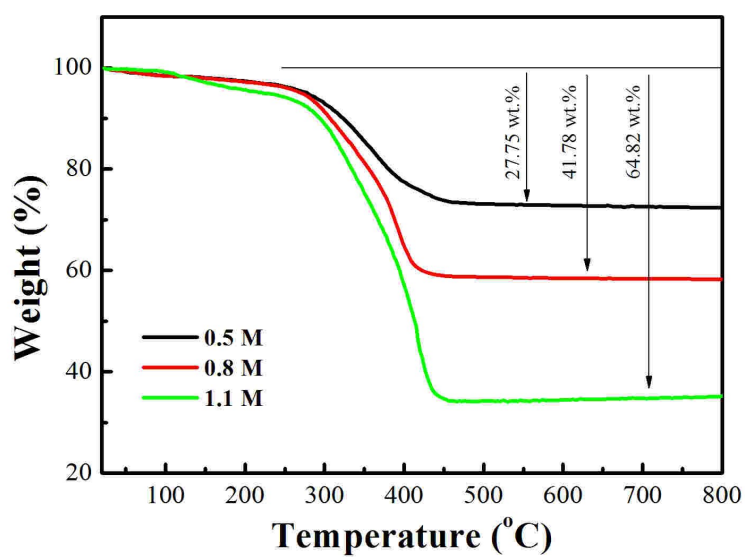

Fig. S2. TG curves of the carbon-coated  $\text{SnO}_2$  precursors.

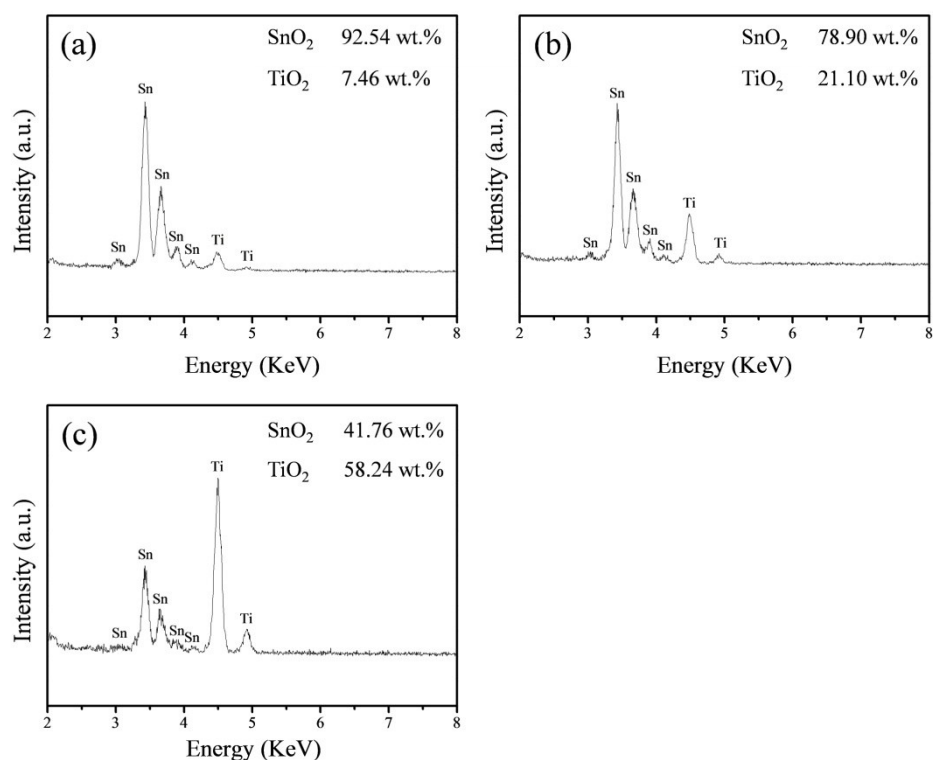

Fig. S3. EDS results of the final composites, (a)  $\text{SnO}_2@ \text{TiO}_2\text{-}0.5$  composite, (b)  $\text{SnO}_2@ \text{TiO}_2\text{-}0.8$  composite and (c)  $\text{SnO}_2@ \text{TiO}_2\text{-}1.1$  composite.

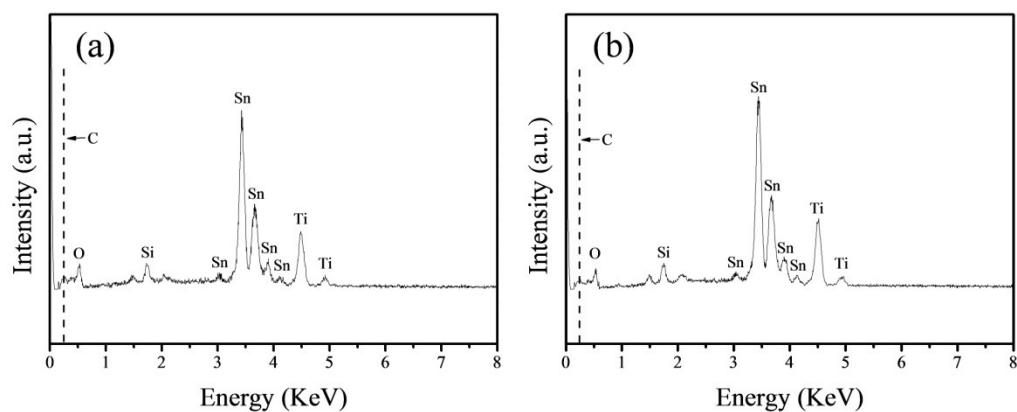

Fig. S4. Comparison of the EDS results of the  $\text{SnO}_2@ \text{TiO}_2\text{-}0.8$  composite obtained by different sintering methods, (a) calcined in Muffle oven, and (b) calcined in tube furnace in air flow.

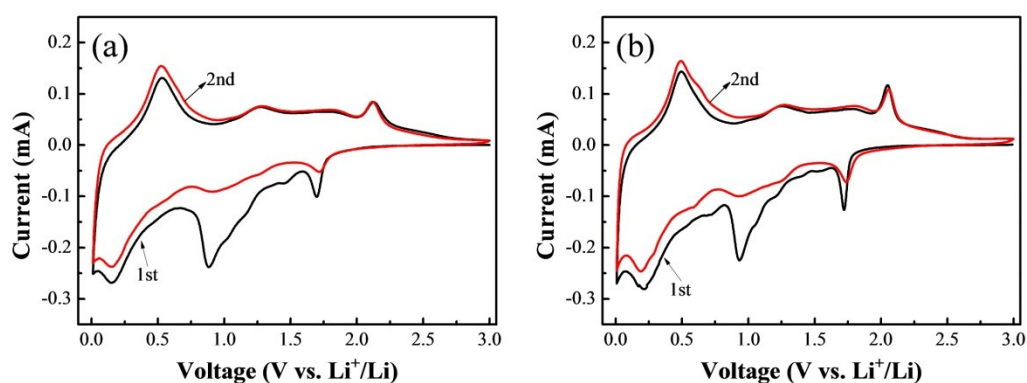

Fig. S5. Comparison of the CV results of the  $\text{SnO}_2@\text{TiO}_2\text{-0.8}$  composite obtained by different sintering methods, (a) calcined in Muffle oven, and (b) calcined in tube furnace in air flow. As shown in Fig. S5, there are no obvious differences between them, further implying the carbon is possible combusted.

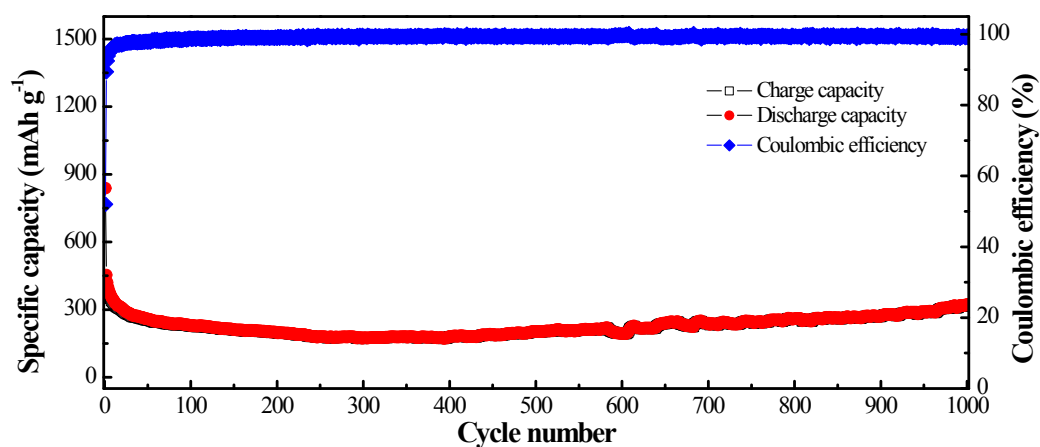

Fig. S6 Galvanostatic charge/discharge cycle performances of the  $\text{SnO}_2@\text{TiO}_2\text{-0.5}$  composite at a current density of  $1000 \text{ mA g}^{-1}$ . It shows that a discharge capacity of  $324 \text{ mAh g}^{-1}$  is delivered after 1000 cycles, lower than that of the  $\text{SnO}_2@\text{TiO}_2\text{-0.8}$  composite ( $617 \text{ mAh g}^{-1}$ ).
